# Supplementary material for: Developing Social Media-Based Suicide Prevention Messages in Partnership With Young People: Exploratory Study
Source: PubMed Central journal article supplement (PMC5647460; doi:10.2196/mental.7847), 2017-10-04
Supplement: mental_v4i4e40_app1.pdf [file mental_v4i4e40_app1.pdf]

## Appendix 1: Impact of Student Involvement Questionnaire

### About you

|     |                                                                                      |     |    |
|-----|--------------------------------------------------------------------------------------|-----|----|
| 1.  | What is your name?                                                                   |     |    |
| 2.  | What is your date of birth?                                                          |     |    |
| 3.  | What is the name of your school?                                                     |     |    |
| 4.  | What year level are you in?                                                          |     |    |
| 5.  | What is your gender?                                                                 |     |    |
| 6.  | Have you ever experienced a mental health problem?                                   | Yes | No |
| 7.  | Have you ever experienced suicidal thoughts or feelings?                             | Yes | No |
| 8.  | Have you ever hurt yourself on purpose?                                              | Yes | No |
| 9.  | Have you ever supported a friend who was experiencing mental health problems?        | Yes | No |
| 10. | Have you ever supported a friend who was experiencing suicidal thoughts or feelings? | Yes | No |
| 11. | Has someone you felt close to ever died by suicide?                                  | Yes | No |

### Project evaluation

The next few questions will ask you what you thought about the project.

|                                                | 1<br>Strongly disagree | 2<br>Disagree | 3<br>Neither agree nor disagree | 4<br>Agree | 5<br>Strongly agree |
|------------------------------------------------|------------------------|---------------|---------------------------------|------------|---------------------|
| Participating in this program has helped me to |                        |               |                                 |            |                     |

|                                                                                                      |  |  |  |  |  |
|------------------------------------------------------------------------------------------------------|--|--|--|--|--|
| develop new skills                                                                                   |  |  |  |  |  |
| As a result of this program I have a better understanding of how to talk about suicide safely online |  |  |  |  |  |
| As a result of this program I have a better understanding of how to talk about suicide generally     |  |  |  |  |  |
| The program has helped to improve my self confidence                                                 |  |  |  |  |  |
| The program has helped me to develop my leadership and/or mentoring skills                           |  |  |  |  |  |
| The program has helped me to further develop my interpersonal skills                                 |  |  |  |  |  |
| The program has helped me to further develop my communication skills                                 |  |  |  |  |  |
| As a result of participating, I feel more able to provide emotional support to others                |  |  |  |  |  |

|                                                                                     |  |  |  |  |  |
|-------------------------------------------------------------------------------------|--|--|--|--|--|
| As a result of participating, I feel more able to educate others about cyber-safety |  |  |  |  |  |
| The <i>Safe Conversations</i> project was enjoyable                                 |  |  |  |  |  |
| The <i>Safe Conversations</i> project was helpful                                   |  |  |  |  |  |
| The <i>Safe Conversations</i> project made me feel upset                            |  |  |  |  |  |
| The <i>Safe Conversations</i> project made me feel suicidal                         |  |  |  |  |  |
| The <i>Safe Conversations</i> project was boring                                    |  |  |  |  |  |
| The <i>Safe Conversations</i> project took up too much of my time                   |  |  |  |  |  |
| I found participating in the <i>Safe Conversations</i> project stressful            |  |  |  |  |  |
| I feel motivated after participating in the <i>Safe Conversations</i> project       |  |  |  |  |  |
| The <i>Safe Conversations</i>                                                       |  |  |  |  |  |

|                        |  |  |  |  |  |
|------------------------|--|--|--|--|--|
| project was worthwhile |  |  |  |  |  |
|------------------------|--|--|--|--|--|

Would you recommend the *Safe Conversations* project to a friend? (*Please tick*)

**Yes**                      **No**

If you answered 'no', please tell us why....

---

---

---

---

Are there any other comments you would like to make about the project?

---

---

---

---
